# Supplementary material for: Thermal stability of Sn anode material with non-aqueous electrolytes in sodium-ion batteries
Source: Royal Society of Chemistry journal article supplement (doi:10.1039/c8ta07854h), 2018-01-01
Supplement: c8ta07854h1.pdf [file c8ta07854h1.pdf]

## ***Supplementary Information***

### **Thermal stability of Sn anode material with non-aqueous electrolytes in sodium-ion batteries**

**Yongho Lee,<sup>ad</sup> Hyojun Lim,<sup>ab</sup> Sang-Ok Kim,<sup>a</sup> Hyung-Seok Kim,<sup>a</sup> Ki Jae Kim,<sup>c</sup> Kwan-Young Lee,<sup>d</sup> and  
Wonchang Choi<sup>\*ab</sup>**

*<sup>a</sup>Center for Energy Storage, Korea Institute of Science and Technology, 5, Hwarang-ro 14-gil, Seongbuk-gu, Seoul 02792, Republic of Korea*

*E-mail address: wonchangchoi@kist.re.kr*

*<sup>b</sup>Division of Energy & Environment Technology, KIST School, Korea University of Science and Technology, Seoul 02792, Republic of Korea*

*<sup>c</sup>Department of Energy Engineering, Konkuk University, 120, Neungdong-ro, Gwangjin-gu, Seoul 05029, Republic of Korea*

*<sup>d</sup>Department of Chemical and Biological Engineering, Korea University, 145, Anam-ro, Sungbuk-gu, Seoul 02841, Republic of Korea*

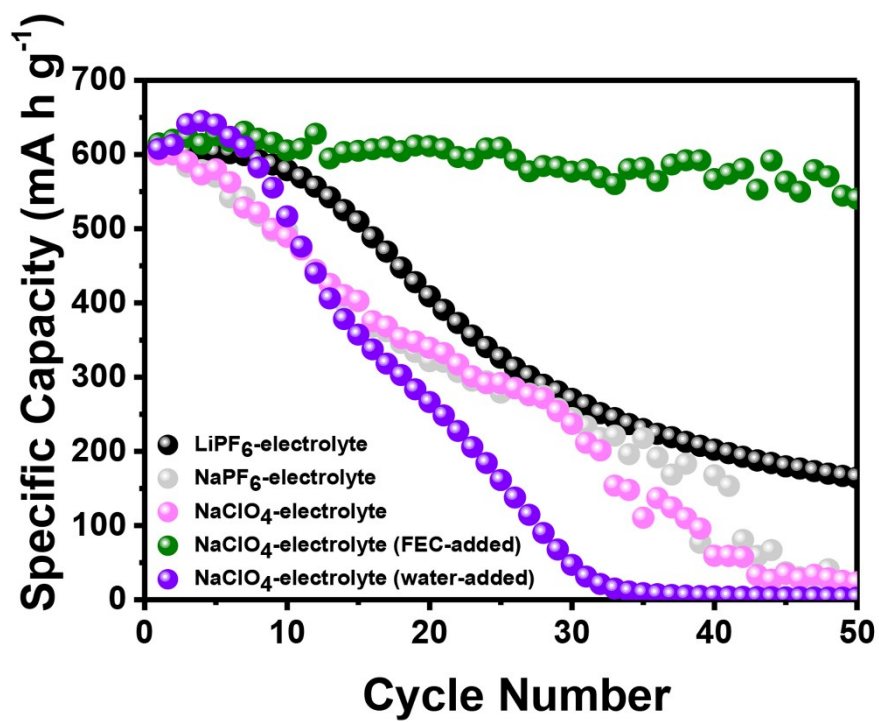

**Fig. S1** Comparison of the cycle performance of the Sn electrodes cycled in various electrolyte.

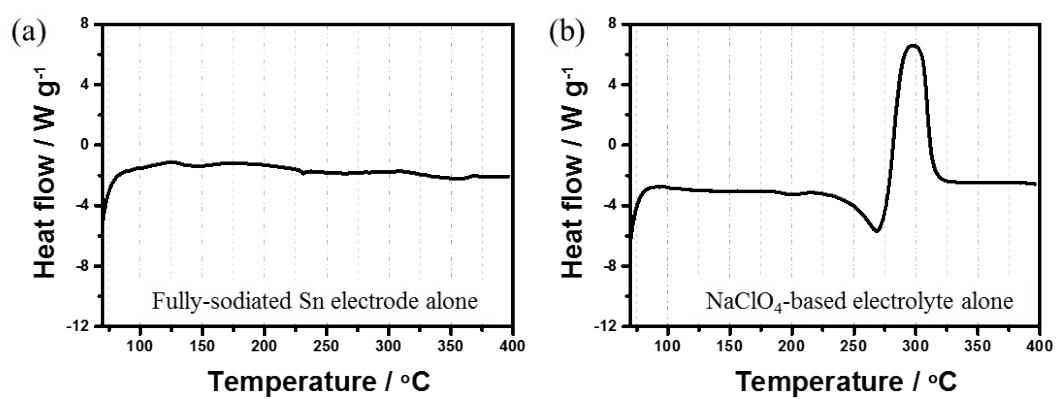

**Fig. S2** DSC profiles of (a) the sodiated Sn electrode and (b) NaClO<sub>4</sub>-based electrolyte alone.

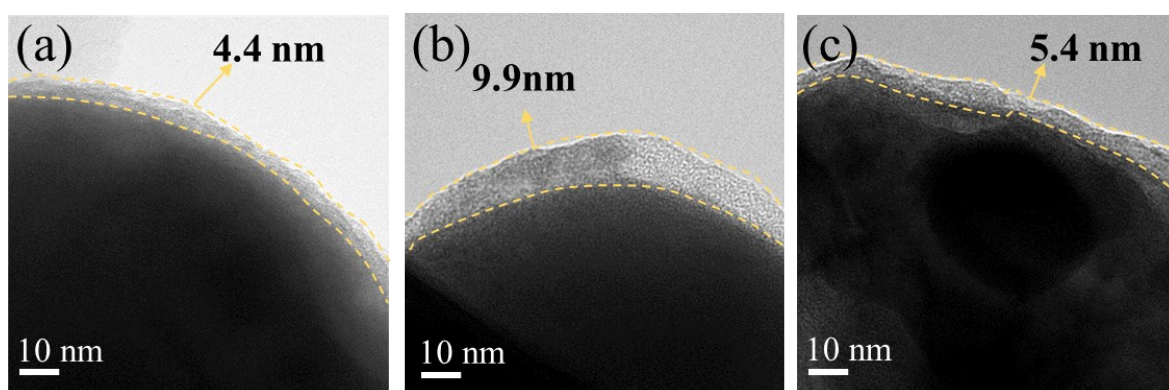

**Fig. S3** TEM images of the Sn electrodes cycled in various electrolyte; (a) LiPF<sub>6</sub><sup>-</sup>, (b) NaPF<sub>6</sub><sup>-</sup> and (c) NaClO<sub>4</sub>-based electrolyte.

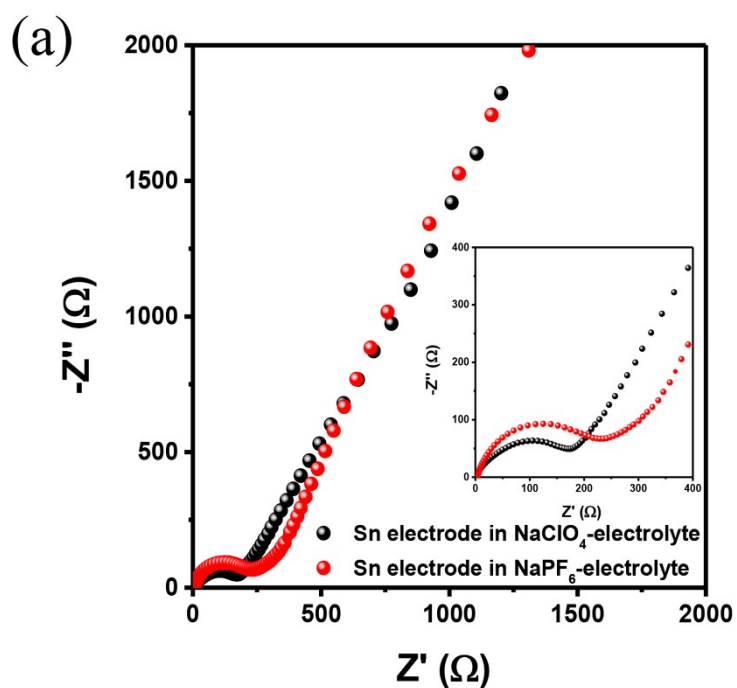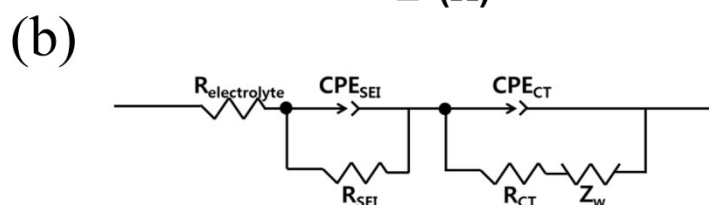

**Fig. S4** (a) Nyquist plots of the Sn electrode cycled in NaPF<sub>6</sub><sup>-</sup> and NaClO<sub>4</sub>-based electrolytes.  
 (b) Equivalent circuit diagram used for fitting the impedance spectra shown in Fig. S4a.

**Table S1** Fitting results of the Nyquist plots using the equivalent circuit for the Sn electrodes cycled in NaPF<sub>6</sub><sup>-</sup> and NaClO<sub>4</sub>-based electrolytes.

|                                       | $R_{\text{electrolyte}} (\Omega)$ | $R_{\text{SEI}} (\Omega)$ | $R_{\text{CT}} (\Omega)$ |
|---------------------------------------|-----------------------------------|---------------------------|--------------------------|
| NaClO <sub>4</sub> -based electrolyte | 2.0                               | 25.1                      | 94.4                     |
| NaPF <sub>6</sub> -based electrolyte  | 3.5                               | 70.0                      | 231.4                    |
